# Supplementary material
Source: Springer Nature journal article supplement (https://www.springermedizin.de/resource/supplementary/12936_2014_3711_MOESM1_ESM.pdf/9545182)
Supplement: MOESM1 [file 9545182]

**S1**

Sal I : MKQLGGLAF LALLNFLTDDNATRGEIVNLKNPLRNGWSMNN SAQNEENIVHSDGSDDDVTDADPGELEGNGSEPKAPKRVHAQGEETRESLKKAAQNAKAEAKAAKAASAKSTLALAKVVPTEADNKKFAEASAAATEAKQENLIATBAEKV --- KELEV : 169  
 Subtype 1 : MKQLGGLAF LALLNFLTDDNATRGEIVNLKNPLRNGWSMNN SAQNEENIVHSDGSDDDVTDADPGELEGNGSEPKAPKRVHAQGEETRESLKKAAQNAKAEAKAAKAASAKSTLALAKVVPTEADNKKFAEASAAATEAKQENLIATBAEKV --- KELEV : 169  
 Subtype 2 : MKQLGGLAF LALLNFLTDDNATRGEIVNLKNPLRNGWSMNN SAQNEENIVHSDGSDDDVTDADPGELEGNGSEPKAPKRVHAQGEETRESLKKAAQNAKAEAKAAKAASAKSTLALAKVVPTEADNKKFAEASAAATEAKQENLIATBAEKV --- KEANG : 169  
 Subtype 3 : MKQLGGLAF LALLNFLTDDNATRGEIVNLKNPLRNGWSMNN SAQNEENIVHSDGSDDDVTDADPGELEGNGSEPKAPKRVHAQGEETRESLKKAAQNAKAEAKAAKAASAKSTLALAKVVPTEADNKKFAEASAAATEAKQENLIATBAEKV --- KEANG : 173  
 Subtype 4 : MKQLGGLAF LALLNFLTDDNATRGEIVNLKNPLRNGWSMNN SAQNEENIVHSDGSDDDVTDADPGELEGNGSEPKAPKRVHAQGEETRESLKKAAQNAKAEAKAAKAASAKSTLALAKVVPTEADNKKFAEASAAATEAKQENLIATBAEKV --- QALEL : 169  
 Subtype 5 : MKQLGGLAF LALLNFLTDDNATRGEIVNLKNPLRNGWSMNN SAQNEENIVHSDGSDDDVTDADPGELEGNGSEPKAPKRVHAQGEETRESLKKAAQNAKAEAKAAKAASAKSTLALAKVVPTEADNKKFAEASAAATEAKQENLIATBAEKV --- QALEL : 169  
 Belem : MKQLGGLAF LALLNFLTDDNATRGEIVNLKNPLRNGWSMNN SAQNEENIVHSDGSDDDVTDADPGELEGNGSEPKAPKRVHAQGEETRESLKKAAQNAKAEAKAAKAASAKSTLALAKVVPTEADNKKFAEASAAATEAKQENLIATBAEKV --- KEANG : 169  
 Chess : MKQLGGLAF LALLNFLTDDNATRGEIVNLKNPLRNGWSMNN SAQNEENIVHSDGSDDDVTDADPGELEGNGSEPKAPKRVHAQGEETRESLKKAAQNAKAEAKAAKAASAKSTLALAKVVPTEADNKKFAEASAAATEAKQENLIATBAEKV --- QALEL : 169

**S2** **S3** **S4**

Sal I : DGDLKRLK EAKAKKAKKQEKIRIATBAEKAKAKAEKAEACATATAKAEVALEKBTIKKRVKTRAKVAKKPKETTRPASEADAKAKACGSEVKKIDNDKDSLNEETRLGLITVKLISASALAEAKAKKIKIQTAAEVKAE : 331  
 Subtype 1 : DGDLKRLK EAKAKKAKKQEKIRIATBAEKAKAKAEKAEACATATAKAEVALEKBTIKKRVKTRAKVAKKPKETTRPASEADAKAKACGSEVKKIDNDKDSLNEETRLGLITVKLISASALAEAKAKKIKIQTAAEVKAE : 331  
 Subtype 2 : EVDLQKLIK EAKAKKAKKQEKIRIATBAEKAKAKAEKAEACATATAKAEVALEKBTIKKRVKTRAKVAKKPKETTRPASEADAKAKACGSEVKKIDNDKDSLNEETRLGLITVKLISASALAEAKAKKIKIQTAAEVKAE : 332  
 Subtype 3 : DGDLKRLK EAKAKKAKKQEKIRIATBAEKAKAKAEKAEACATATAKAEVALEKBTIKKRVKTRAKVAKKPKETTRPASEADAKAKACGSEVKKIDNDKDSLNEETRLGLITVKLISASALAEAKAKKIKIQTAAEVKAE : 338  
 Subtype 4 : DGDLKRLK EAKAKKAKKQEKIRIATBAEKAKAKAEKAEACATATAKAEVALEKBTIKKRVKTRAKVAKKPKETTRPASEADAKAKACGSEVKKIDNDKDSLNEETRLGLITVKLISASALAEAKAKKIKIQTAAEVKAE : 341  
 Subtype 5 : DGDLKRLK EAKAKKAKKQEKIRIATBAEKAKAKAEKAEACATATAKAEVALEKBTIKKRVKTRAKVAKKPKETTRPASEADAKAKACGSEVKKIDNDKDSLNEETRLGLITVKLISASALAEAKAKKIKIQTAAEVKAE : 341  
 Belem : EVDLQKLIK EAKAKKAKKQEKIRIATBAEKAKAKAEKAEACATATAKAEVALEKBTIKKRVKTRAKVAKKPKETTRPASEADAKAKACGSEVKKIDNDKDSLNEETRLGLITVKLISASALAEAKAKKIKIQTAAEVKAE : 332  
 Chess : DGDLKRLK EAKAKKAKKQEKIRIATBAEKAKAKAEKAEACATATAKAEVALEKBTIKKRVKTRAKVAKKPKETTRPASEADAKAKACGSEVKKIDNDKDSLNEETRLGLITVKLISASALAEAKAKKIKIQTAAEVKAE : 341

**Insert A**

Sal I : KARIEEPAEKEEAGEAKTKETTTQAEVLEKISNSKAAQVKKAVEKAKEABTQASGAGNARIKNDAGGVLEDEIKETSDDIEDIINTVKEIASNAEPAKSNAKKEMVRAQIAAEVAKAEKAKIIEANAKLLADTASKAENIATAKSSKAAKIANNVSTIAAEKSKVATEAADE : 504  
 Subtype 1 : KARIEEPAEKEEAGEAKTKETTTQAEVLEKISNSKAAQVKKAVEKAKEABTQASGAGNARIKNDAGGVLEDEIKETSDDIEDIINTVKEIASNAEPAKSNAKKEMVRAQIAAEVAKAEKAKIIEANAKLLADTASKAENIATAKSSKAAKIANNVSTIAAEKSKVATEAADE : 504  
 Subtype 2 : KARIEEPAEKEEAGEAKTKETTTQAEVLEKISNSKAAQVKKAVEKAKEABTQASGAGNARIKNDAGGVLEDEIKETSDDIEDIINTVKEIASNAEPAKSNAKKEMVRAQIAAEVAKAEKAKIIEANAKLLADTASKAENIATAKSSKAAKIANNVSTIAAEKSKVATEAADE : 504  
 Subtype 3 : KARIEEPAEKEEAGEAKTKETTTQAEVLEKISNSKAAQVKKAVEKAKEABTQASGAGNARIKNDAGGVLEDEIKETSDDIEDIINTVKEIASNAEPAKSNAKKEMVRAQIAAEVAKAEKAKIIEANAKLLADTASKAENIATAKSSKAAKIANNVSTIAAEKSKVATEAADE : 504  
 Subtype 4 : KARIEEPAEKEEAGEAKTKETTTQAEVLEKISNSKAAQVKKAVEKAKEABTQASGAGNARIKNDAGGVLEDEIKETSDDIEDIINTVKEIASNAEPAKSNAKKEMVRAQIAAEVAKAEKAKIIEANAKLLADTASKAENIATAKSSKAAKIANNVSTIAAEKSKVATEAADE : 504  
 Subtype 5 : KARIEEPAEKEEAGEAKTKETTTQAEVLEKISNSKAAQVKKAVEKAKEABTQASGAGNARIKNDAGGVLEDEIKETSDDIEDIINTVKEIASNAEPAKSNAKKEMVRAQIAAEVAKAEKAKIIEANAKLLADTASKAENIATAKSSKAAKIANNVSTIAAEKSKVATEAADE : 504  
 Belem : KARIEEPAEKEEAGEAKTKETTTQAEVLEKISNSKAAQVKKAVEKAKEABTQASGAGNARIKNDAGGVLEDEIKETSDDIEDIINTVKEIASNAEPAKSNAKKEMVRAQIAAEVAKAEKAKIIEANAKLLADTASKAENIATAKSSKAAKIANNVSTIAAEKSKVATEAADE : 504  
 Chess : KARIEEPAEKEEAGEAKTKETTTQAEVLEKISNSKAAQVKKAVEKAKEABTQASGAGNARIKNDAGGVLEDEIKETSDDIEDIINTVKEIASNAEPAKSNAKKEMVRAQIAAEVAKAEKAKIIEANAKLLADTASKAENIATAKSSKAAKIANNVSTIAAEKSKVATEAADE : 504

**Insert B**

Sal I : AKAKALDEITNPEPKIAEVTTEKATKAVNAEAEAKKEKAKAEVAVEVAHAVEVAKEAQEAKAAKQVADKSKLEKAIQADAKSEKANEASKLAEALSNLESLENETGTEIVEKVNAIEQKVQATKNAAIENHKETKAEIAVEVAKAEAEAKKIDANAKVAEERAKTAEKIAKI : 677  
 Subtype 1 : AKAKALDEITNPEPKIAEVTTEKATKAVNAEAEAKKEKAKAEVAVEVAHAVEVAKEAQEAKAAKQVADKSKLEKAIQADAKSEKANEASKLAEALSNLESLENETGTEIVEKVNAIEQKVQATKNAAIENHKETKAEIAVEVAKAEAEAKKIDANAKVAEERAKTAEKIAKI : 677  
 Subtype 2 : AKAKALDEITNPEPKIAEVTTEKATKAVNAEAEAKKEKAKAEVAVEVAHAVEVAKEAQEAKAAKQVADKSKLEKAIQADAKSEKANEASKLAEALSNLESLENETGTEIVEKVNAIEQKVQATKNAAIENHKETKAEIAVEVAKAEAEAKKIDANAKVAEERAKTAEKIAKI : 677  
 Subtype 3 : AKAKALDEITNPEPKIAEVTTEKATKAVNAEAEAKKEKAKAEVAVEVAHAVEVAKEAQEAKAAKQVADKSKLEKAIQADAKSEKANEASKLAEALSNLESLENETGTEIVEKVNAIEQKVQATKNAAIENHKETKAEIAVEVAKAEAEAKKIDANAKVAEERAKTAEKIAKI : 677  
 Subtype 4 : AKAKALDEITNPEPKIAEVTTEKATKAVNAEAEAKKEKAKAEVAVEVAHAVEVAKEAQEAKAAKQVADKSKLEKAIQADAKSEKANEASKLAEALSNLESLENETGTEIVEKVNAIEQKVQATKNAAIENHKETKAEIAVEVAKAEAEAKKIDANAKVAEERAKTAEKIAKI : 677  
 Subtype 5 : AKAKALDEITNPEPKIAEVTTEKATKAVNAEAEAKKEKAKAEVAVEVAHAVEVAKEAQEAKAAKQVADKSKLEKAIQADAKSEKANEASKLAEALSNLESLENETGTEIVEKVNAIEQKVQATKNAAIENHKETKAEIAVEVAKAEAEAKKIDANAKVAEERAKTAEKIAKI : 677  
 Belem : AKAKALDEITNPEPKIAEVTTEKATKAVNAEAEAKKEKAKAEVAVEVAHAVEVAKEAQEAKAAKQVADKSKLEKAIQADAKSEKANEASKLAEALSNLESLENETGTEIVEKVNAIEQKVQATKNAAIENHKETKAEIAVEVAKAEAEAKKIDANAKVAEERAKTAEKIAKI : 677  
 Chess : AKAKALDEITNPEPKIAEVTTEKATKAVNAEAEAKKEKAKAEVAVEVAHAVEVAKEAQEAKAAKQVADKSKLEKAIQADAKSEKANEASKLAEALSNLESLENETGTEIVEKVNAIEQKVQATKNAAIENHKETKAEIAVEVAKAEAEAKKIDANAKVAEERAKTAEKIAKI : 677

**S5**

Sal I : KEAKKANEKASYALIRTKKQALEPLETISEAGYITEKEEQVKEIEEEDQKAESEEDTQDQDDEVDIVDNEBEEEGAEQSEEGKDTPEKEEEDQSGEILDDKEAHTLAEFKFDNSNAKTGDKLETLISDVGEDTLKNQODLHCYFQK --- : 1016  
 Subtype 1 : KEAKKANEKASYALIRTKKQALEPLETISEAGYITEKEEQVKEIEEEDQKAESEEDTQDQDDEVDIVDNEBEEEGAEQSEEGKDTPEKEEEDQSGEILDDKEAHTLAEFKFDNSNAKTGDKLETLISDVGEDTLKNQODLHCYFQK --- : 698  
 Subtype 2 : KEAKKANEKASYALIRTKKQALEPLETISEAGYITEKEEQVKEIEEEDQKAESEEDTQDQDDEVDIVDNEBEEEGAEQSEEGKDTPEKEEEDQSGEILDDKEAHTLAEFKFDNSNAKTGDKLETLISDVGEDTLKNQODLHCYFQK --- : 697  
 Subtype 3 : KEAKKANEKASYALIRTKKQALEPLETISEAGYITEKEEQVKEIEEEDQKAESEEDTQDQDDEVDIVDNEBEEEGAEQSEEGKDTPEKEEEDQSGEILDDKEAHTLAEFKFDNSNAKTGDKLETLISDVGEDTLKNQODLHCYFQK --- : 703  
 Subtype 4 : KEAKKANEKASYALIRTKKQALEPLETISEAGYITEKEEQVKEIEEEDQKAESEEDTQDQDDEVDIVDNEBEEEGAEQSEEGKDTPEKEEEDQSGEILDDKEAHTLAEFKFDNSNAKTGDKLETLISDVGEDTLKNQODLHCYFQK --- : 826  
 Subtype 5 : KEAKKANEKASYALIRTKKQALEPLETISEAGYITEKEEQVKEIEEEDQKAESEEDTQDQDDEVDIVDNEBEEEGAEQSEEGKDTPEKEEEDQSGEILDDKEAHTLAEFKFDNSNAKTGDKLETLISDVGEDTLKNQODLHCYFQK --- : 826  
 Belem : KEAKKANEKASYALIRTKKQALEPLETISEAGYITEKEEQVKEIEEEDQKAESEEDTQDQDDEVDIVDNEBEEEGAEQSEEGKDTPEKEEEDQSGEILDDKEAHTLAEFKFDNSNAKTGDKLETLISDVGEDTLKNQODLHCYFQK --- : 697  
 Chess : KEAKKANEKASYALIRTKKQALEPLETISEAGYITEKEEQVKEIEEEDQKAESEEDTQDQDDEVDIVDNEBEEEGAEQSEEGKDTPEKEEEDQSGEILDDKEAHTLAEFKFDNSNAKTGDKLETLISDVGEDTLKNQODLHCYFQK --- : 826

|           | No. of isolates (n) |
|-----------|---------------------|
| Subtype 1 | 9                   |
| Subtype 2 | 11                  |
| Subtype 3 | 40                  |
| Subtype 4 | 23                  |
| Subtype 5 | 12                  |
